# Supplementary material for: Antioxidant and Antitumor Potential of Micropropagated Balkan Endemic Sideritis scardica Griseb
Source: MDPI journal article supplement (doi:10.3390/plants12233924), 2023-11-21
Supplement: s1 [file s1]

**Supplementary Table S1.** Total polyphenol and flavonoid content, and antioxidant activity of freeze-dried extracts from *in vitro* propagated shoots, *in vitro* obtained field grown and *in situ* cultivated *Sideritis scardica* plants.

| Sample | Total polyphenols,<br>mg GAE/100g DW | Total flavonoids,<br>mg RE/100g DW | ORAC,<br>μmol TE/g DW    | HORAC,<br>μmol GAE/g DW |
|--------|--------------------------------------|------------------------------------|--------------------------|-------------------------|
| ICP    | 12095.8±1207.6 <sup>b</sup>          | 1902.5±229.3 <sup>a</sup>          | 2595.4±33.5 <sup>b</sup> | 718.0±40.5 <sup>b</sup> |
| FGP    | 13853.4±627.3 <sup>c</sup>           | 3394.2±248.7 <sup>b</sup>          | 2708.4±73.7 <sup>c</sup> | 838.4±19.0 <sup>c</sup> |
| IVS    | 7870.4±223.1 <sup>a</sup>            | 1600.9±12.2 <sup>a</sup>           | 1072.2±23.0 <sup>a</sup> | 459.1±18.3 <sup>a</sup> |
| LSD    | 1591                                 | 188                                | 97                       | 56                      |

Legend: ICP – *in situ* cultivated plants; FGP – *in vitro* obtained, field grown plants; IVS – *in vitro* propagated shoots. The data are presented as means of 3 samples ± standard deviation (SD). Different letters indicate significant differences assessed by Fisher LSD test ( $P \leq 0.05$ ) after performing ANOVA multifactor analysis.
